# Supplementary material
Source: publisher figshare collection journal article supplement (https://gsajournals.figshare.com/ndownloader/files/22717448)
Supplement: Supplementary file 1 [file 22717448]

## Sheet: Table_S3
Supplemental Table S3. The average value of features used for the Arabidopsis model. P-values indicate the statistical significance of the difference between causal genes and genome genes. Fisher's exact test was used for all binary features. Mann-Whitney U Test was used for all continuous variables.
Feature	Feature defination	Causal gene	Genome gene	P-value
is_carbohydrates_metabolism	gene encodes an enzyme involved in carbohydrates metabolism	0.062201	0.0503019	0.424863
is_nucleotides_metabolism	gene encodes an enzyme involved in nucleotides_metabolism	0.0239234	0.021595	0.808235
is_energy_metabolism	gene encodes an enzyme involved in energy_metabolism	0.0191388	0.0188169	0.799998
is_fatty_acids_lipids_metabolism	gene encodes an enzyme involved in fatty_acids_lipids_metabolism	0.0143541	0.0285217	0.294508
is_specialized_metabolism	gene encodes an enzyme involved in specialized_metabolism	0.0956938	0.0361892	9.3e-05
is_cofactors_metabolism	gene encodes an enzyme involved in cofactors_metabolism	0.0191388	0.0210394	1
is_hormones_metabolism	gene encodes an enzyme involved in hormones_metabolism	0.0478469	0.0120013	0.000278298
is_inorganic_nutrients_metabolism	gene encodes an enzyme involved in inorganic_nutrients_metabolism	0.0478469	0.0141497	0.000960834
is_detoxification_metabolism	gene encodes an enzyme involved in detoxification_metabolism	0	0.00933437	0.271837
is_redox_metabolism	gene encodes an enzyme involved in redox_metabolism	0	0.00700078	0.409812
is_amino_acids_metabolism	gene encodes an enzyme involved in amino_acids_metabolism	0.0287081	0.0164463	0.16451
is_other_metabolism	gene encodes an enzyme involved in other_metabolism	0.0239234	0.0128903	0.2014
is_macromolecule_metabolism	gene encodes an enzyme involved in macromolecule_metabolism	0.138756	0.128533	0.677767
is_TF	gene encodes a transcription factor	0.205742	0.0620069	4.77e-12
is_receptor	gene encodes a receptor	0.0430622	0.00640812	1.23e-05
is_kinase	gene encodes a protein kinase	0.143541	0.109086	0.118568
is_transporter	gene encodes a transporter	0.114833	0.0793051	0.0707868
paralog_copy_number	number of paralogs a gene has	51.3062	30.2637	5e-16
is_essential_gene	gene is essential or not	0.0334928	0.100493	0.000450742
network_weight	the weight sum of the gene in the co-function network AraNet or RiceNet	115.897	126.584	0.00123493
is_start_gained	gene contains a polymorshism that causes a gain of start codon or not	0.488038	0.4299	0.0927545
is_start_lost	gene contains a polymorshism that causes a loss of start codon or not	0.0717703	0.0733044	1
is_stop_gained	gene contains a polymorshism that causes a gain of stop codon or not	0.4689	0.35804	0.00108967
is_stop_lost	gene contains a polymorshism that causes a loss of stop codon or not	0.0813397	0.0804163	0.898591
is_nonsyn_deleterious	gene contains a deterious non-synonymous SNP or not	0.956938	0.823721	1.27e-08
normalized_nonsyn_SNP	the number of non-synonymous SNPs in the gene	0.127738	0.113305	0.00742039
is_splice_site_SNP	gene contains a SNP in intron splicing site or not	0.210526	0.195096	0.598949
TFBS_snp	gene contains a SNP in predicted transcrition factor binding site or not	1.07656	1.17843	0.291174
TFBS_indel	gene contains an Indel in predicted transcrition factor binding site or not	0.253589	0.227433	0.438345
CE_indel	gene contains an indel in predicted cis-element or not	6.39234	5.00552	0.000171788
CE_snp	gene contains a SNP in predicted cis-element or not	80.177	70.358	7.56e-05
percent_absence	the percent of natural variant accessions in a species that do not have this gene	0.0501794	0.0280809	6.99e-05
